# Supplementary material for: Cancer-Testis Genes Are Coordinately Expressed and Are Markers of Poor Outcome in Non–Small Cell Lung Cancer
Source: Oxford University Press journal article supplement (doi:10.1158/1078-0432.ccr-05-1203), 2005-11-15
Supplement: 10780432ccr051203-sup-supplementary_table_3.pdf [file 10780432ccr051203-sup-supplementary_table_3.pdf]

**Supplementary Table 2.**

CT-X expression and statistically significant clinical associations for various histologic subtypes of NSCLC

| Sex              | CT              | Histology    | male         | female      | <i>P</i>   |             |          |
|------------------|-----------------|--------------|--------------|-------------|------------|-------------|----------|
|                  | SSX4            | BAC/AdenoBAC | 3/13 (19%)   | 0/31 (0%)   | 0.04       |             |          |
|                  | NY-ESO-1[high]  | BAC/AdenoBAC | 4/29 (14%)   | 1/66 (2%)   | 0.03       |             |          |
|                  | NY-ESO-1[high]  | Squamous ca. | 16/58 (28%)  | 2/37 (5%)   | 0.007      |             |          |
|                  | MAGE-A10[high]  | BAC/AdenoBAC | 5/21 (24%)   | 2/52 (4%)   | 0.02       |             |          |
| Smoke            | CT              | Histology    | 0            | 1           | <i>P</i>   |             |          |
|                  | Any CT-X [high] | BAC/AdenoBAC | 1/15 (7%)    | 27/69 (39%) | 0.02       |             |          |
|                  | SSX2            | Adeno ca.    | 3/9 (33%)    | 5/71 (7%)   | 0.04       |             |          |
| Tumor size       | CT              | Histology    | ≤ 3          | > 3         | <i>P</i>   |             |          |
|                  | LAGE-1[high]    | BAC/AdenoBAC | 2/47 (4%)    | 7/36 (19%)  | 0.04       |             |          |
|                  | MAGE-A1[high]   | Adeno ca.    | 24/121 (20%) | 25/73 (34%) | 0.03       |             |          |
|                  | MAGE-A4[high]   | Adeno ca.    | 7/74 (9%)    | 11/42 (26%) | 0.03       |             |          |
|                  | MAGE-A4[high]   | Squamous ca. | 8/26 (31%)   | 19/29 (66%) | 0.02       |             |          |
|                  | SSX4[high]      | Adeno ca.    | 0/57 (0%)    | 4/22 (15%)  | 0.008      |             |          |
| T stage          | CT              | Histology    | 1            | 2           | 3          | 4           | <i>P</i> |
|                  | Any CT-X [high] | Adeno ca.    | 31/90 (34.%) | 44/98 (45%) | 6/10 (60%) | 10/19 (53%) | 0.05     |
|                  | NY-ESO-1[high]  | Adeno ca.    | 8/90 (9%)    | 15/98 (15%) | 3/9 (33%)  | 5/19 (26%)  | 0.01     |
|                  | LAGE-1[high]    | BAC/AdenoBAC | 1/35 (3%)    | 5/38 (13%)  | 1/1(100%)  | 2/9 (22%)   | 0.03     |
|                  | SSX2[high]      | Adeno ca.    | 1/42 (2%)    | 1/42 (2%)   | 0/5 (0%)   | 2/7 (22%)   | 0.03     |
|                  | SSX4[high]      | Adeno ca.    | 0/37 (0%)    | 2/34 (6%)   | 1/5 (20%)  | 1/7 (13%)   | 0.04     |
| N stage          | CT              | Histology    | 0            | 1-2         | <i>P</i>   |             |          |
|                  | MAGE-A4         | BAC/AdBAC    | 7/61 (12%)   | 5/14 (36%)  | 0.04       |             |          |
|                  | SSX4            | Squamous ca. | 4/29 (14%)   | 4/7 (57%)   | 0.03       |             |          |
|                  | LAGE-1[high]    | BAC/AdBAC    | 4/68 (6%)    | 5/15 (33%)  | 0.008      |             |          |
|                  | MAGE-A10[high]  | Squamous ca. | 8/26 (31%)   | 9/14 (64%)  | 0.05       |             |          |
|                  | SSX4[high]      | Squamous ca. | 1/29 (4%)    | 3/7 (43%)   | 0.02       |             |          |
| P stage          | CT              | Histology    | I            | II          | III        | IV          | <i>P</i> |
|                  | LAGE-1[high]    | BAC/AdenoBAC | 3/60 (5%)    | 1/4 (25%)   | 5/12 (42%) | 0/7 (0%)    | 0.05     |
|                  | MAGE-A10[high]  | Squamous ca. | 8/24 (33%)   | 4/11 (37%)  | 4/5 (80%)  | 1/1 (100%)  | 0.05     |
| Pleural invasion | CT              | Histology    | 0            | 1           | <i>P</i>   |             |          |
|                  | Any CT-X        | BAC/AdenoBAC | 34/65 (52%)  | 21/24 (88%) | 0.003      |             |          |
|                  | LAGE-1          | Squamous ca. | 15/43 (35%)  | 19/30 (63%) | 0.02       |             |          |
|                  | MAGE-A3         | BAC/AdBAC    | 23/65 (35%)  | 15/24 (63%) | 0.03       |             |          |
|                  | NY-ESO-1[high]  | Adeno ca.    | 12/132 (9%)  | 14/63 (22%) | 0.02       |             |          |
|                  | LAGE-1[high]    | Adeno ca.    | 16/112 (14%) | 16/50 (32%) | 0.02       |             |          |
|                  | LAGE-1[high]    | Squamous ca. | 10/43 (23%)  | 16/30 (53%) | 0.01       |             |          |
|                  | MAGE-A1[high]   | Squamous ca. | 22/49 (45%)  | 19/27 (70%) | 0.05       |             |          |
|                  | MAGE-A4[high]   | Adeno ca.    | 5/68 (7%)    | 9/38 (24%)  | 0.03       |             |          |
| GGO              | CT              | Histology    | 0            | 1           | <i>P</i>   |             |          |
|                  | MAGE-A4         | Adeno        | 16/54 (30%)  | 0/11 (0%)   | 0.05       |             |          |
|                  | MAGE-A1[high]   | Squamous ca. | 21/34 (62%)  | 0/4 (0%)    | 0.03       |             |          |
